# Supplementary material for: Oral Pyronaridine Tetraphosphate Reduces Tissue Presence of Parasites in a Mouse Model of Chagas Disease
Source: PubMed Central journal article supplement (PMC11375811; doi:10.1021/acsomega.4c05060), 2024-08-20
Supplement: ao4c05060_si_001.pdf [file ao4c05060_si_001.pdf]

## Supplemental data

### Oral Pyronaridine Tetrphosphate Reduces Tissue Presence of Parasites in a Mouse Model of Chagas Disease

Jair Lage Siqueira-Neto<sup>1\*</sup>, Thomas R. Lane<sup>2</sup>, Jean A. Bernatchez<sup>1</sup>, Claudia Magalhaes Calvet Alvarez<sup>1,3</sup>, Elany Barbosa da Silva<sup>1</sup>, Miriam A. Giardini<sup>1</sup> and Sean Ekins<sup>2\*</sup>

<sup>1</sup>Center for Discovery and Innovation in Parasitic Diseases, Skaggs School of Pharmacy and Pharmaceutical Sciences, University of California, San Diego, La Jolla, CA, USA

<sup>2</sup>Collaborations Pharmaceuticals, Inc., 840 Main Campus Drive, Lab 3510, Raleigh, NC 27606, USA. <sup>3</sup>Laboratório de Ultraestrutura Celular, Instituto Oswaldo Cruz, FIOCRUZ, Rio de Janeiro, RJ, Brazil, 21040-300

\*To whom correspondence should be addressed: Jair Lage de Siqueira-Neto E-mail address: [jlagedesiqueiraneto@health.ucsd.edu](mailto:jlagedesiqueiraneto@health.ucsd.edu) Sean Ekins, E-mail address: [sean@collaborationspharma.com](mailto:sean@collaborationspharma.com)

Number of pages (18), figures (7) , and tables (2).

**Short running title:** Pyronaridine *in vivo* efficacy against Chagas Disease

**Figure S1.** Pyronaridine antiparasitic activity ( $IC_{50}$ ) was assessed by phenotypic analysis of infected C2C12 with different *T. cruzi* strains as described in the Methods section. ( $n \geq 2$ ,  $\pm SD$ , error bars represent SD).  $IC_{50}$ s are calculated using a 4-parameter dose response curve fit using Graphpad Prism 10.0.2. SDs of  $IC_{50}/CC_{50}$  are shown when calculatable.

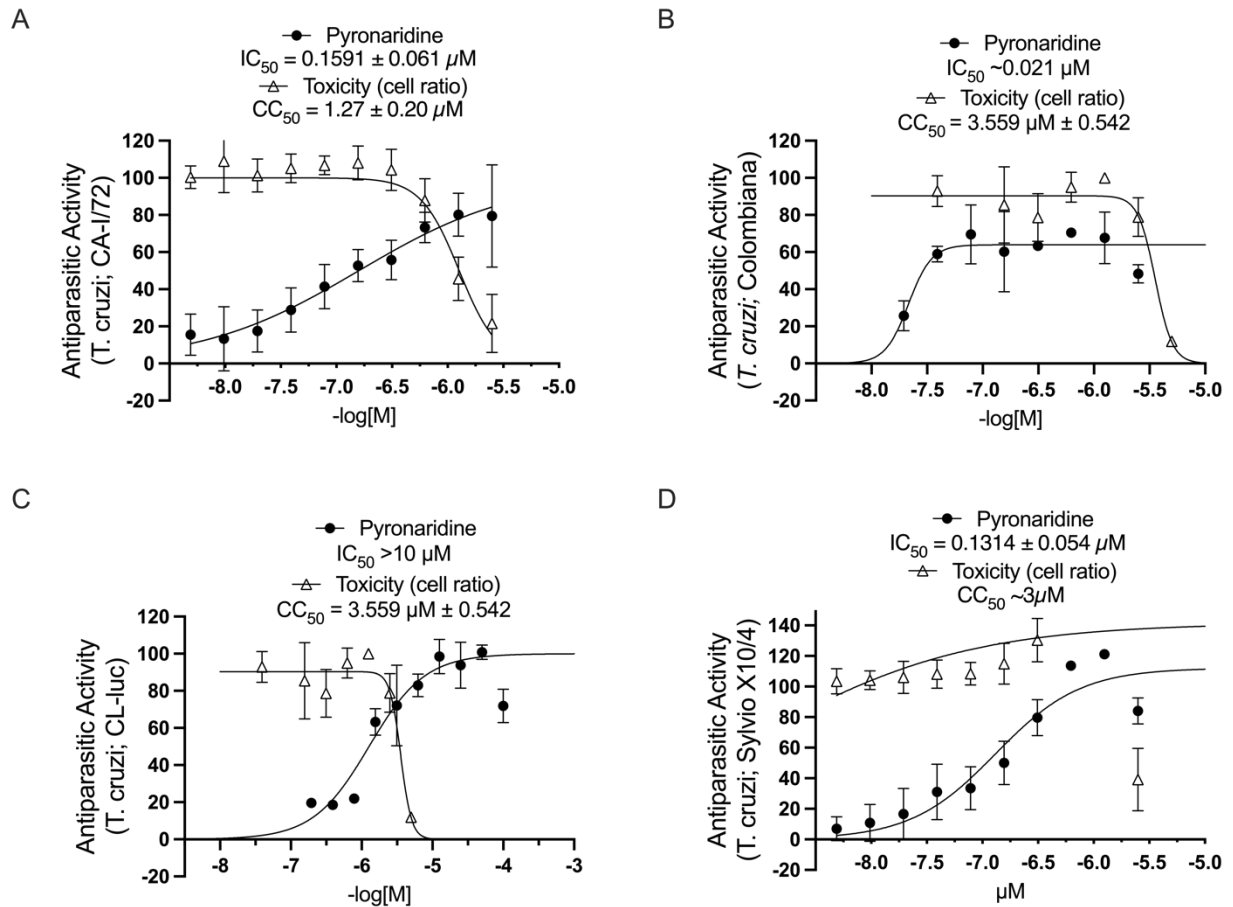

**Figure S2.** Antiparasitic synergy analysis (SynergyFinder 3.0) of a checkerboard assay with pyronaridine and benznidazole activity as assessed by a phenotypic analysis of infected C2C12 with *T. cruzi* strain CA-I/72. Dose-response plots of the inhibition (A, C) and cell toxicity (B, D) of the individual drugs from the checkerboard assay as fitted by four-parameter logistic curve (n=12). IC<sub>50</sub>s and CC<sub>50</sub>s were calculated using Prism 10.2 (4-parameter fit, ± SD). The mean response, with SD shown below, of each condition for inhibition (E) and cell toxicity (F). Synergy determination was done using the bliss algorithm as implemented in SynergyFinder 3.0. The 2D synergy maps (G, H) highlight synergistic and antagonistic dose regions in red and green colors, respectively. Based on their criteria:  $x < -10$  antagonistic;  $-10 \geq x \geq 10$  additive;  $>10$  synergistic, defining PYR and BZ as not synergistic.

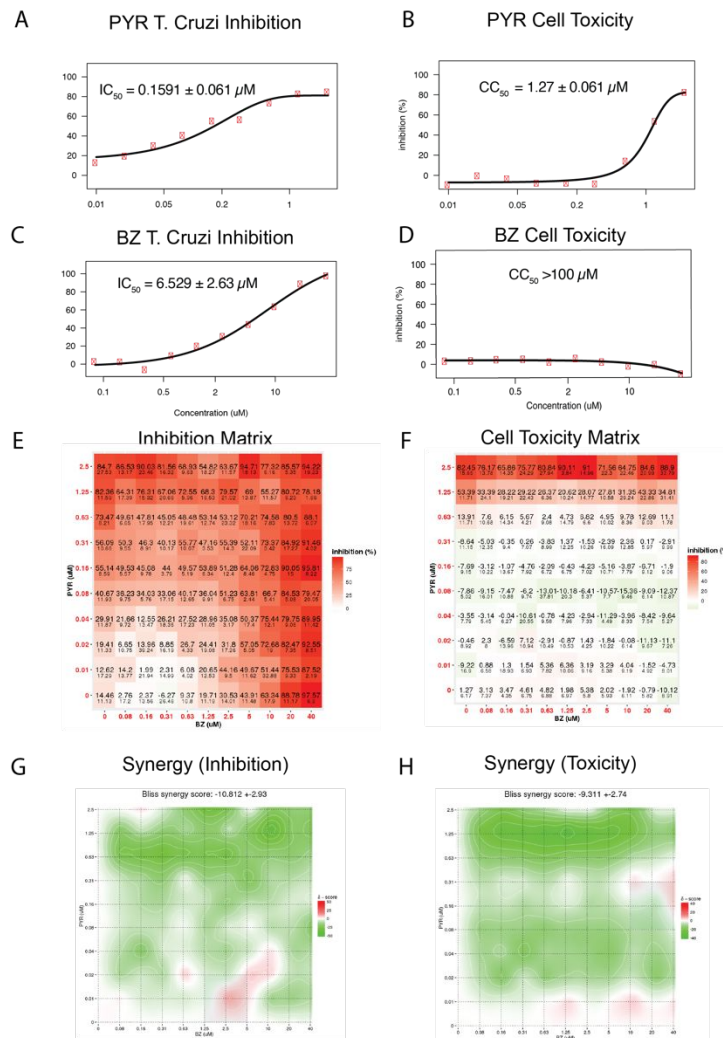

**Figure S3.** Antiparasitic synergy analysis (SynergyFinder 3.0) of a checkerboard assay with pyronaridine and benznidazole activity as assessed by a phenotypic analysis of infected C2C12 with *T. cruzi* strain Sylvio X10/4. Dose-response plots of the inhibition (A, C) and cell toxicity (B, D) of the individual drugs from the checkerboard assay as fitted by four-parameter logistic curve (n=12). IC<sub>50</sub>s and CC<sub>50</sub>s were calculated using Prism 10.2 (4-parameter fit, ± SD). The mean response, with SD shown below, of each condition for inhibition (E) and cell toxicity (F). Synergy determination was done using the bliss algorithm as implemented in SynergyFinder 3.0. The 2D synergy maps (G, H) highlight synergistic and antagonistic dose regions in red and green colors, respectively. Based on their criteria: x < -10 antagonistic; -10 ≥ x ≥ 10 additive; >10 synergistic, defining PYR and BZ as not synergistic.

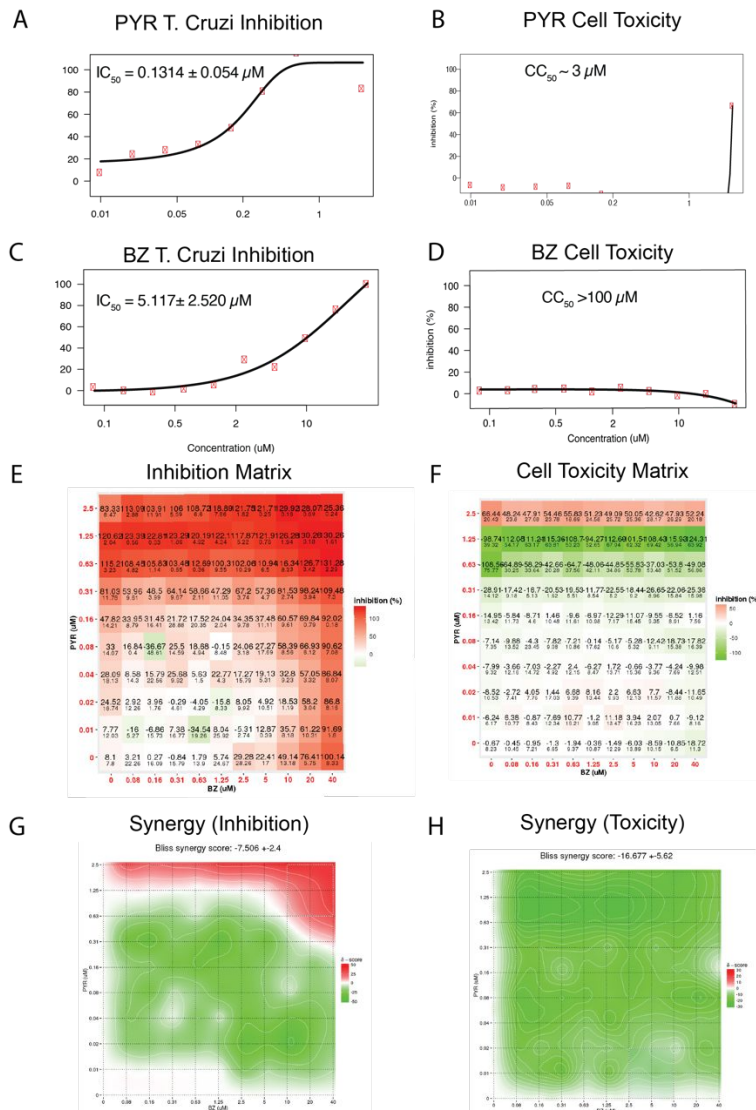

**Figure S4.** Antiparasitic activity of oral pyronaridine (PYR) or benznidazole (Bz) against *T. cruzi* br-luc 7 days post infection following treatment a three-day (days 3-6) treatment of PYR (oral or i.p.) or Bz (oral). Comparison of total flux is represented graphically (A) based on the luminescent signal in mice following treatment with different drugs or vehicle (B, C). Total flux analysis is sex independent, but samples are separately shown for male (B) and female (C) mice. Statistical significance was determined using an ordinary one-way ANOVA with Dunnett's multiple comparisons test against the vehicle as calculated in Graphpad Prism 10.0. Percent inhibition is calculated from the mean of each group as compared to the vehicle and only statistically significant inhibition is shown (\*\*\*)  $p \leq 0.001$ .

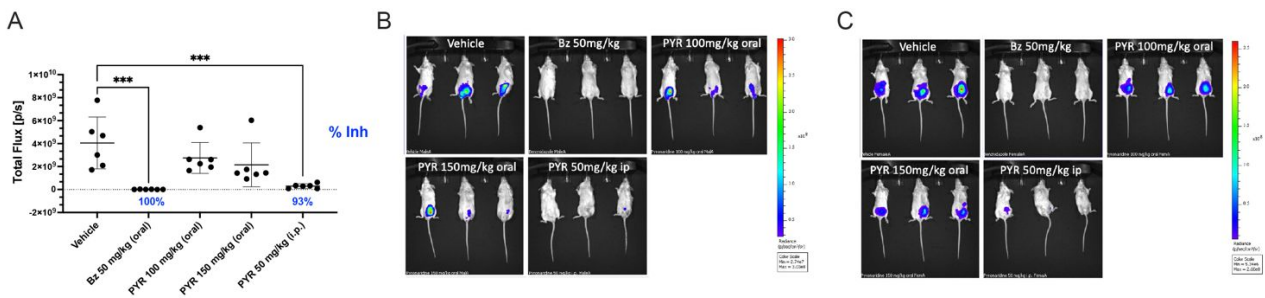

**Figure S5.** Plasma exposure of a single i.p. or p.o. dose (50 mg/kg) of pyronaridine in mice.

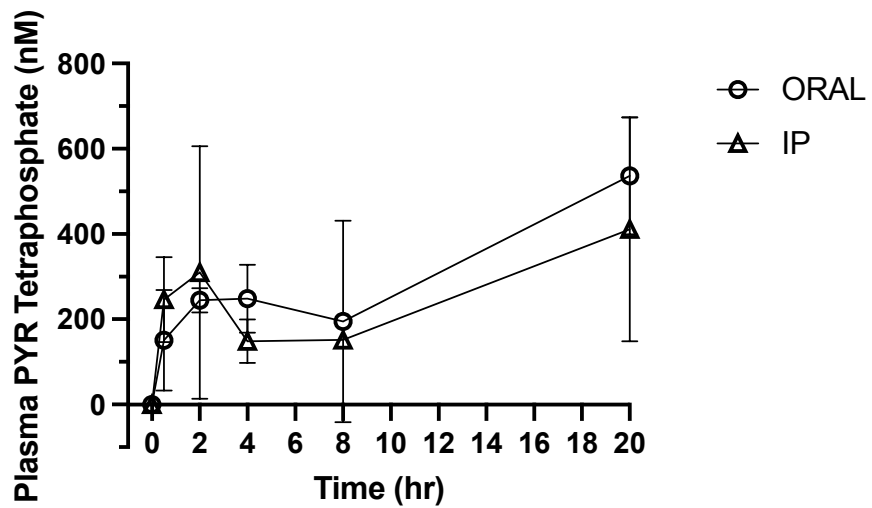

**Figure S6.** Assessing suboptimal antiparasitic dosing with benznidazole (Bz) activity against *T. cruzi* Br-luc 7 days post infection following treatment a four-day (days 3-6) treatment (oral). Comparison of total flux is represented graphically (A) based on the luminescent signal in mice following treatment with different concentration of Bz or vehicle (B). Statistical significance was determined using an ordinary one-way ANOVA with Dunnett's multiple comparisons test against the vehicle as calculated in Graphpad Prism 10.0. No statistically significant difference was seen from control, but % inhibition is calculated from the mean of each group as compared to the vehicle.

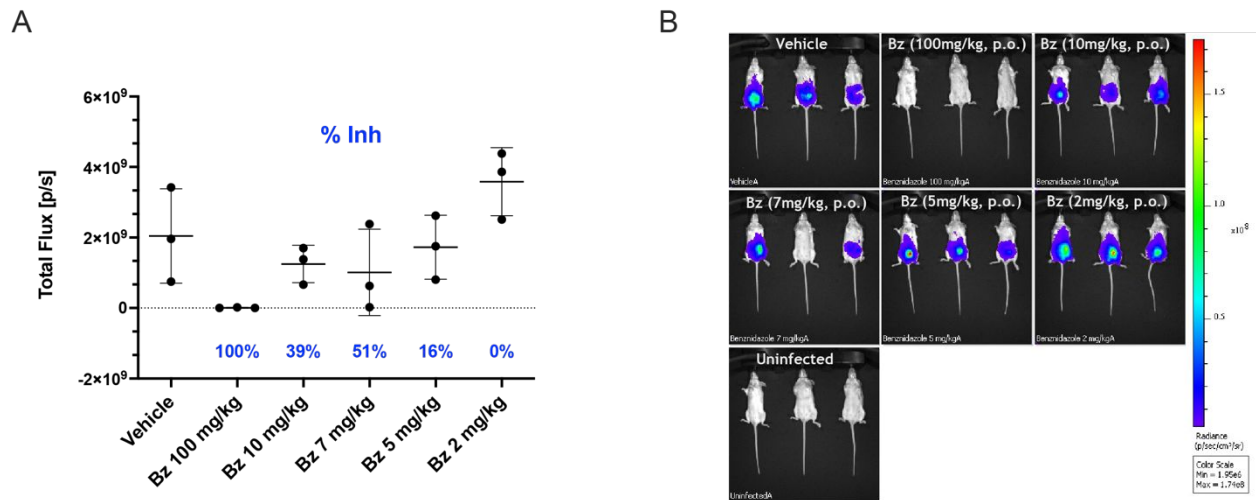

**Figure S7.** Mouse weights from chronic infection study. (A) Mouse weight, and (B) percent weight change. ‘Day 0’ is 3 months post infection. Both the pyronaridine (PYR) alone and PYR + Benznidazole (BZ) had statistically significant weight loss as compared to the uninfected vehicle control using an ordinary one-way ANOVA with Dunnett’s multiple comparisons test. analysis using Prism 10.0. (\*  $p \leq 0.05$ , \*\*  $p \leq 0.01$ ).

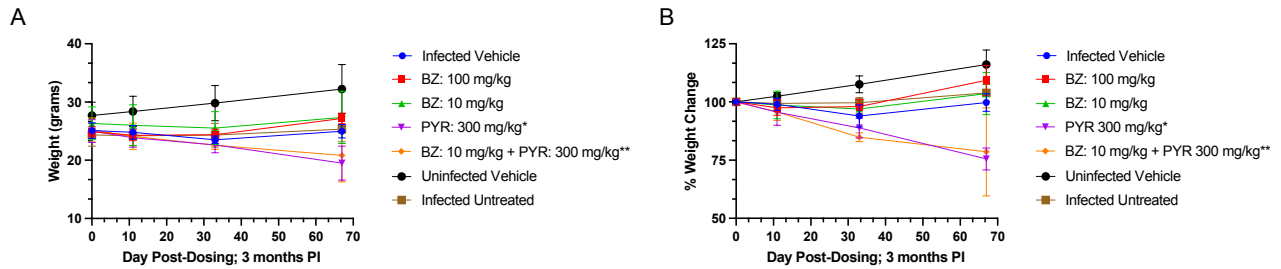



**Figure S8. EKG Samples for chronic infection study 7- and 8-months post-infection (PI).** Each pair (7/8 months PI) are representative examples from the same mouse. N/A signifies the EKG was unable to be taken.

Infected, BZ 10 mg/kg + PYR 300 mg/kg

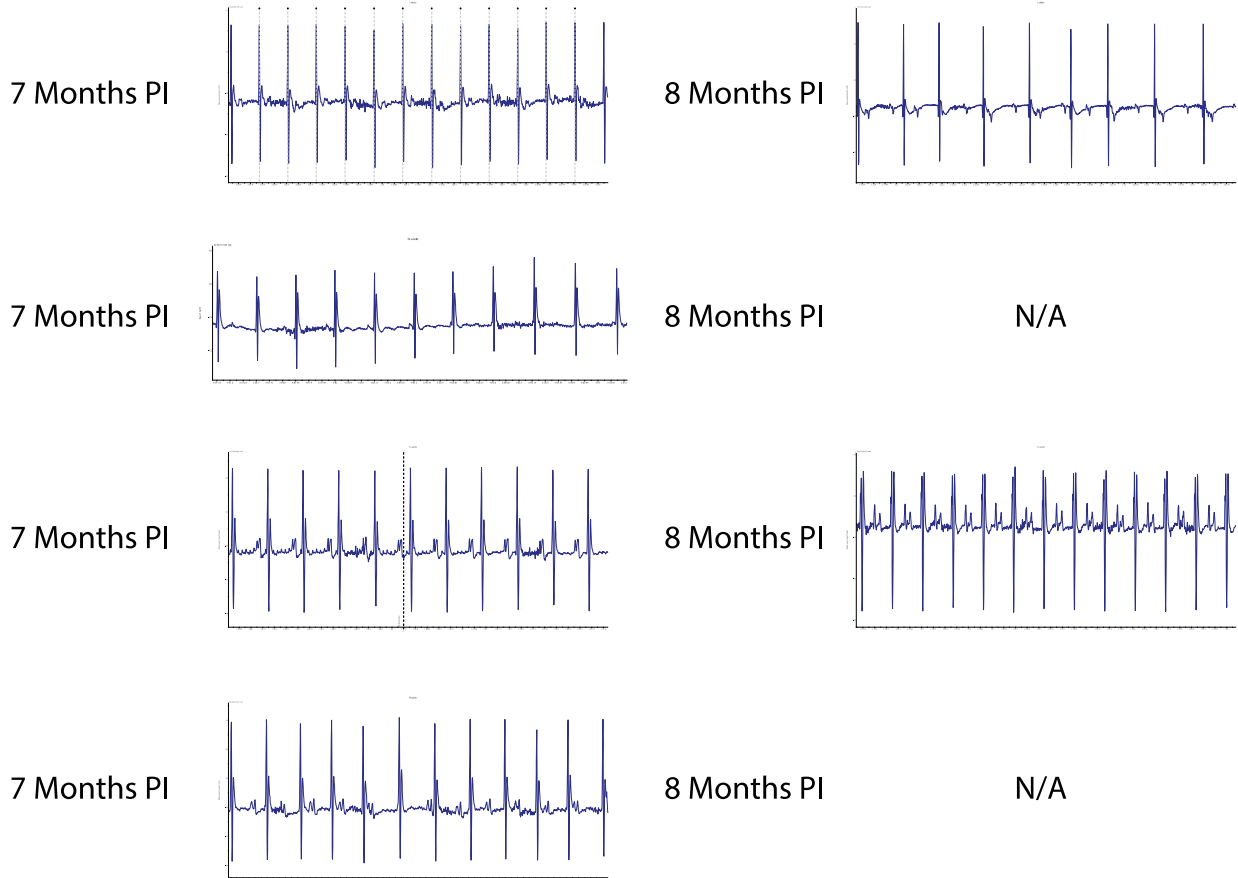

Infected, BZ 100 mg/kg

7 Months PI

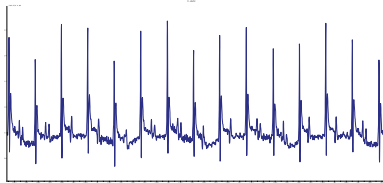

8 Months PI

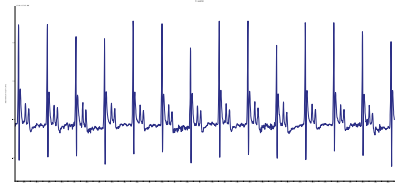

7 Months PI

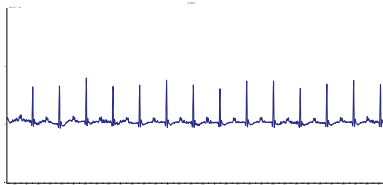

8 Months PI

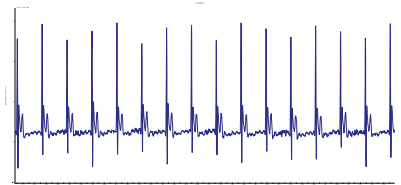

7 Months PI

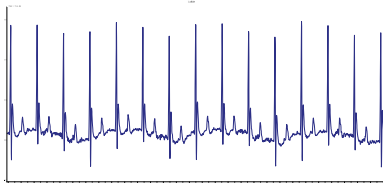

8 Months PI

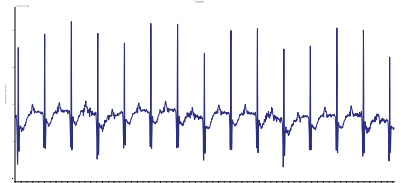

7 Months PI

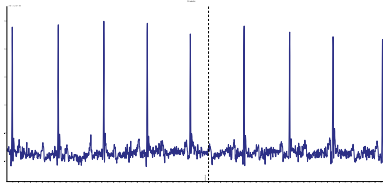

8 Months PI

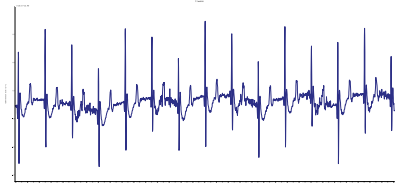

Infected, BZ 10 mg/kg

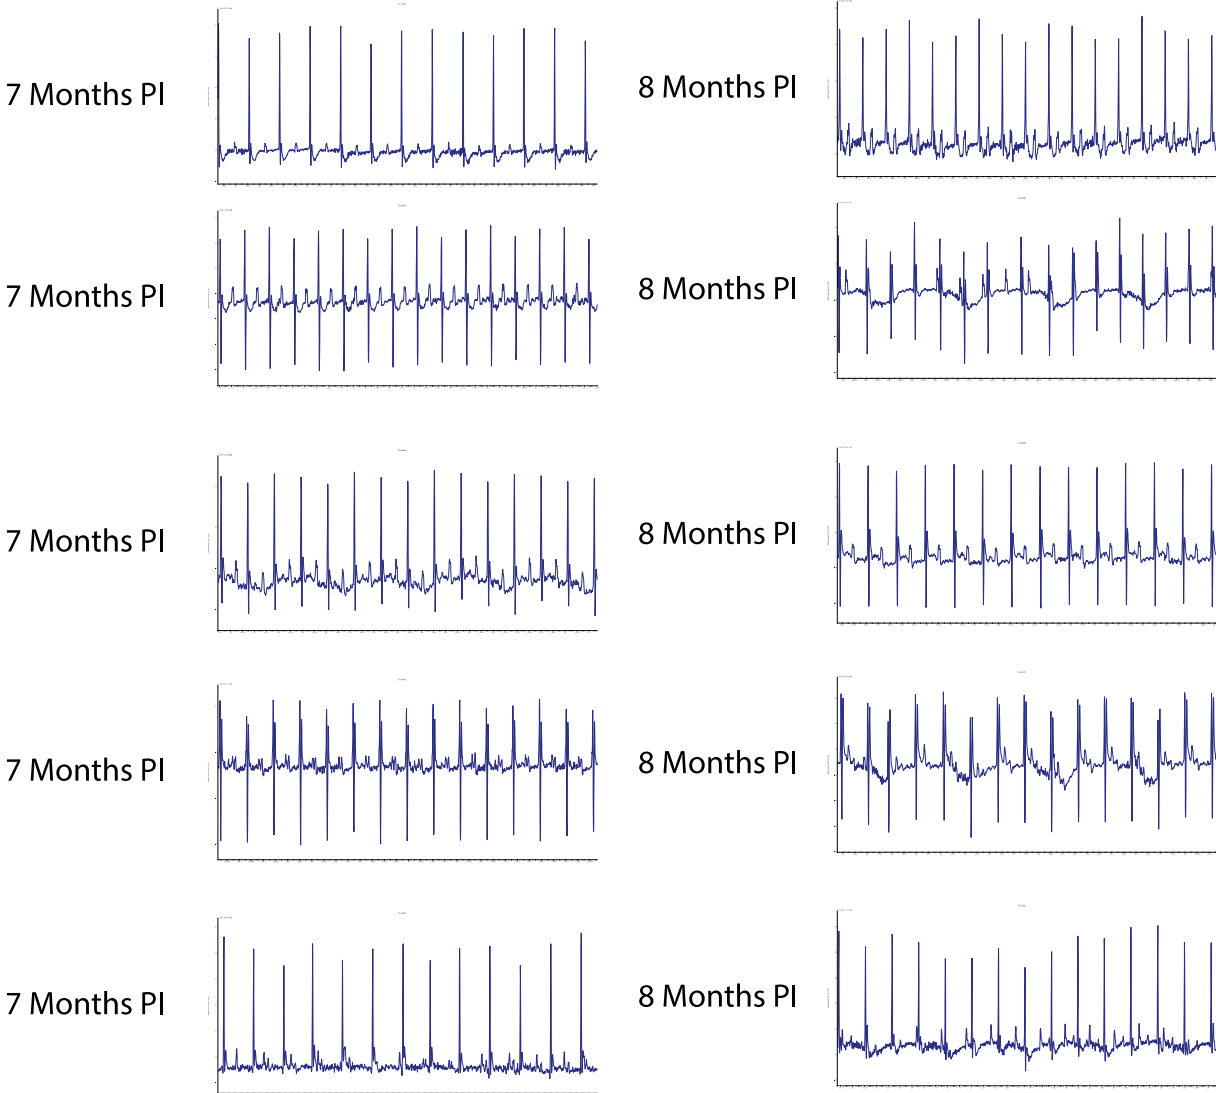

Infected, BZ 100 mg/kg

7 Months PI

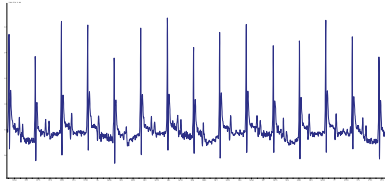

8 Months PI

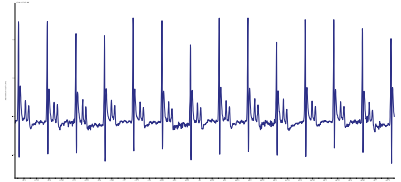

7 Months PI

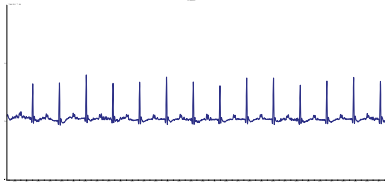

8 Months PI

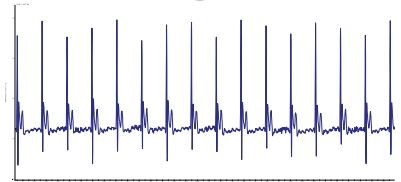

7 Months PI

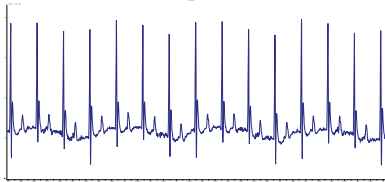

8 Months PI

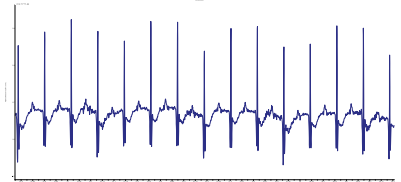

7 Months PI

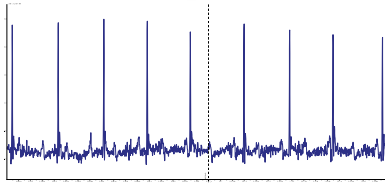

8 Months PI

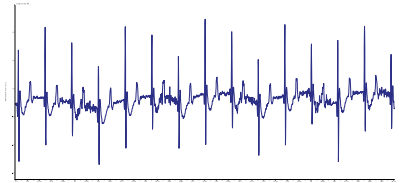

Infected, PYR 300 mg/kg

7 Months PI

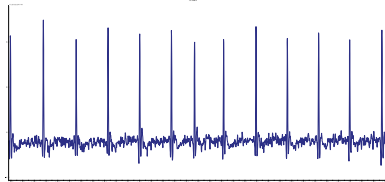

8 Months PI

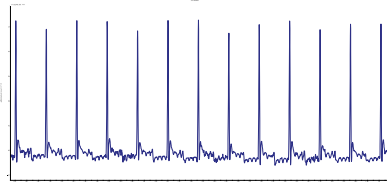

7 Months PI

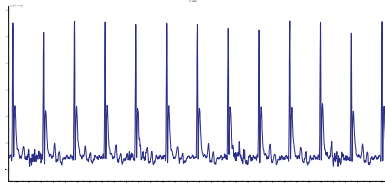

8 Months PI

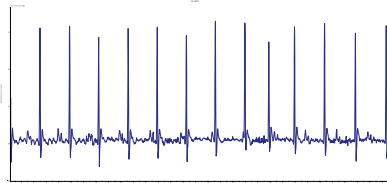

7 Months PI

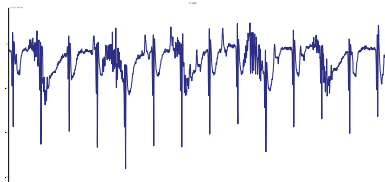

8 Months PI

N/A

7 Months PI

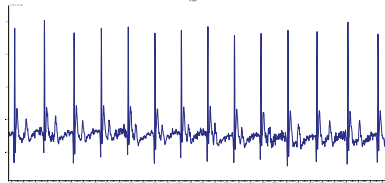

8 Months PI

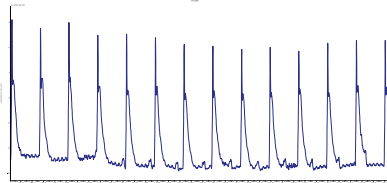

Infected, Untreated

7 Months PI

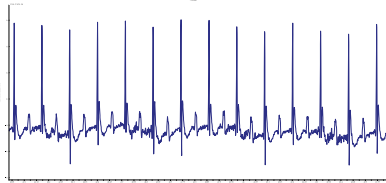

8 Months PI

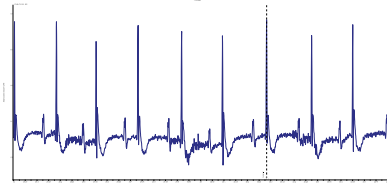

7 Months PI

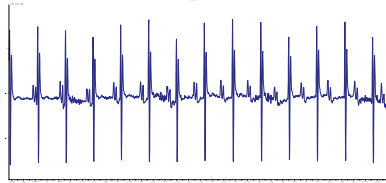

8 Months PI

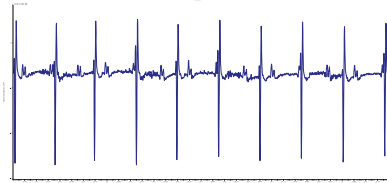

7 Months PI

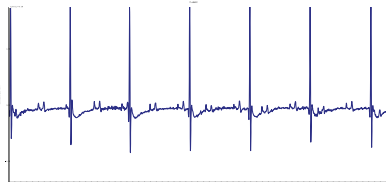

8 Months PI

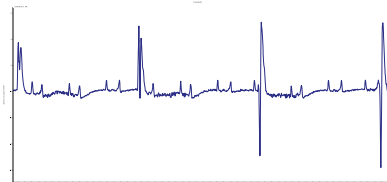

7 Months PI

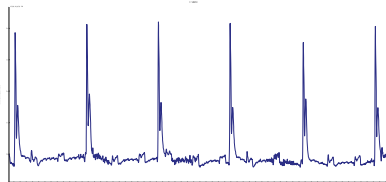

8 Months PI

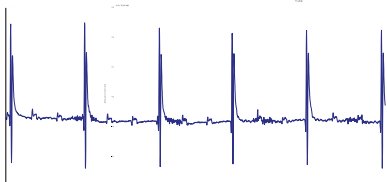

7 Months PI

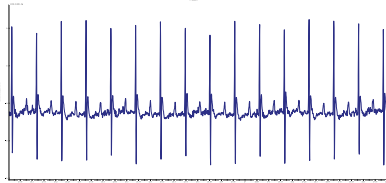

8 Months PI

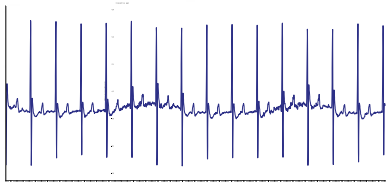

7 Months PI

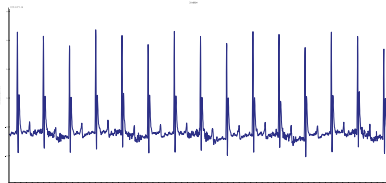

8 Months PI

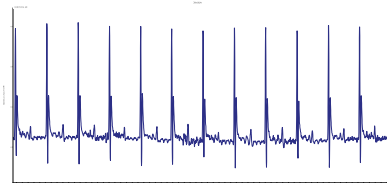

Infected, Vehicle Treated

7 Months PI

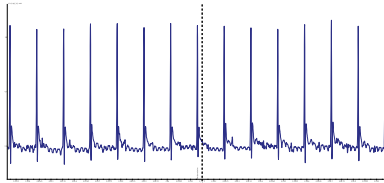

8 Months PI

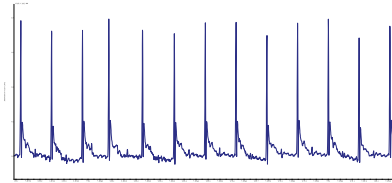

7 Months PI

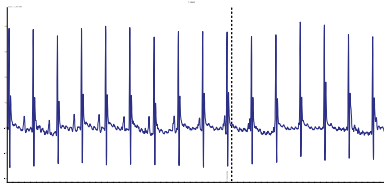

8 Months PI

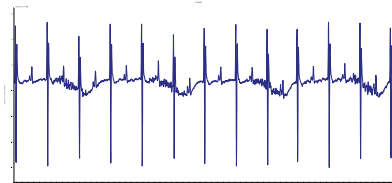

7 Months PI

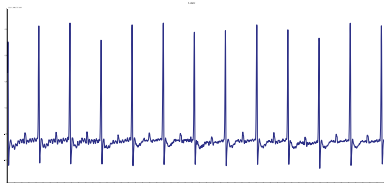

8 Months PI

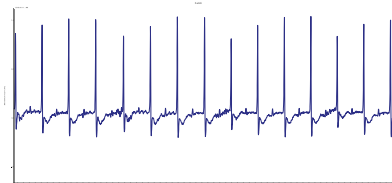

7 Months PI

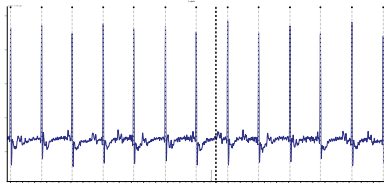

8 Months PI

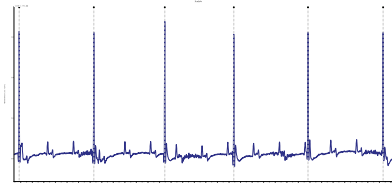

7 Months PI

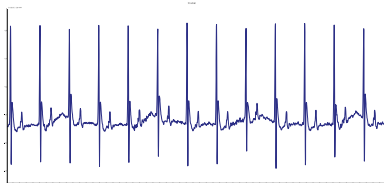

8 Months PI

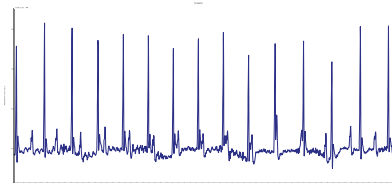

**Figure S9.** Results for from the chronic study against *T. cruzi* Sylvio X10/4. Parasite burden: (A) RT-PCR results from the collected heart samples. Statistical significance of the data (log transformed for RT-PCR) was determined using an ordinary one-way ANOVA with Dunnett's multiple comparisons test for each group as calculated in Graphpad Prism 10.0.2. (\*  $p \leq 0.05$ , \*\*  $p \leq 0.01$ , \*\*\*  $p \leq 0.001$ , \*\*\*\*  $p \leq 0.0001$ ). Bars represent SD from the mean (line). For RT-PCR, all values below the lower limit of detection (LLOD) are set to 0.5xLLOD.



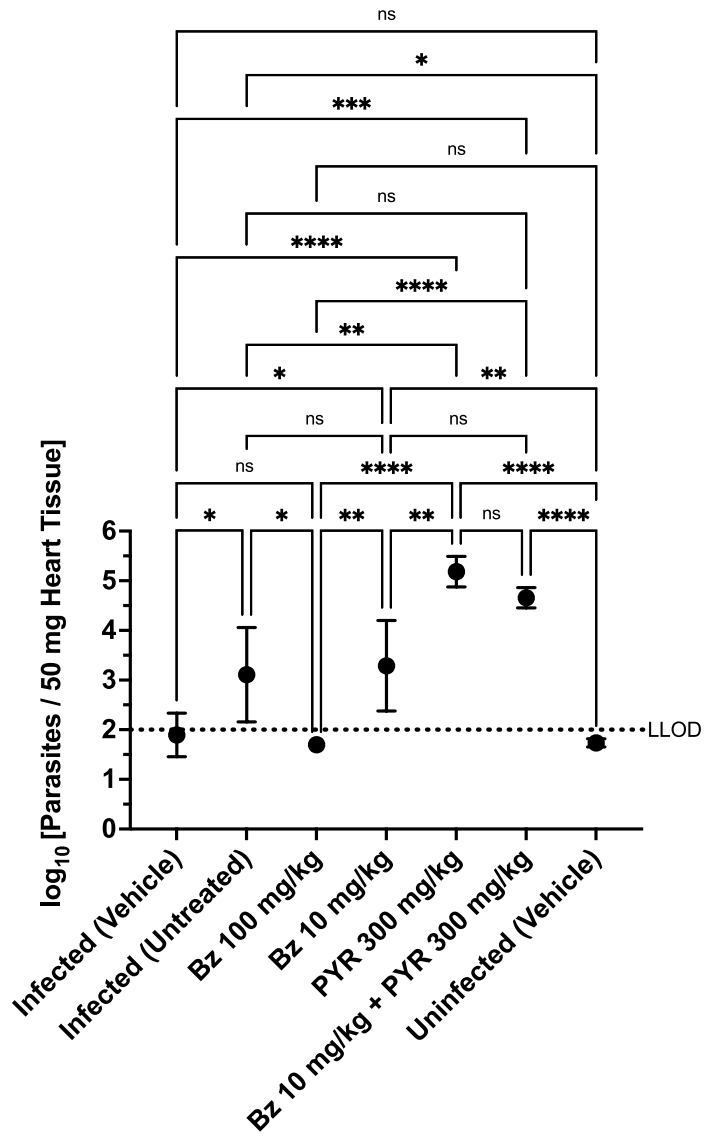

**Table S1.** Comparison of Pyronaridine efficacy in two different acute mouse models of Chagas disease. The *in vivo* study comparing the efficacy of different oral doses of pyronaridine against the CL-luc strain of *T. cruzi* to determine the minimum effective dose, did not result in the same levels of antiparasitic activity previously observed in the acute mouse model of Chagas disease infected with the Brazil-luc strain of *T. cruzi* and dosed by a different route (ip) (Ekins et al, 2015). A comparison table of the experiments is shown below:

|                         | <i>T. cruzi</i> strain | Parasite load                 | Pyronaridine dose/ route | Vehicle     | Parasite burden reduction after 4 days treatment |
|-------------------------|------------------------|-------------------------------|--------------------------|-------------|--------------------------------------------------|
| Ekins et al, 2015       | Brazil-luc             | 10 <sup>6</sup> parasites, ip | 100mg/kg, bid, ip        | Solutol 20% | 83%                                              |
| Current study, Dec/2017 | CL-luc                 | 10 <sup>3</sup> parasites, ip | 50, 100, 150mg/kg, po    | Solutol 20% | <20%                                             |

ip: intraperitoneal; po: oral (gavage); bid: twice a day;

**Table S2.** Cardiac function assessment from mice in different time points post-infection and post-treatment. ND = not determined, N/A = not applicable, ‘?’ represents ambiguity in the results.

| Infection status | Treatment Group                                         | Mouse # | 3 Months PI | 4 Months PI | 5 Months PI | 6 Months PI | 7 Months PI | 8 Months PI |
|------------------|---------------------------------------------------------|---------|-------------|-------------|-------------|-------------|-------------|-------------|
| Infected         | Vehicle                                                 | 6       | Normal      | Abnormal    | Abnormal    | Abnormal    | Abnormal    | Abnormal    |
| Infected         |                                                         | 7       | Normal      | Abnormal    | Abnormal    | Abnormal    | Abnormal    | Abnormal    |
| Infected         |                                                         | 8       | Abnormal    | N/A         | Abnormal    | Abnormal?   | Abnormal?   | Abnormal?   |
| Infected         |                                                         | 9       | Abnormal    | Abnormal    | Abnormal    | Abnormal    | Abnormal    | Abnormal    |
| Infected         |                                                         | 10      | Normal      | Normal      | Abnormal    | Abnormal    | Abnormal    | Abnormal    |
| Infected         | Benznidazole<br>10 mg/ kg                               | 21      | Normal      | Normal      | Abnormal    | Abnormal    | Abnormal    | Abnormal    |
| Infected         |                                                         | 22      | Normal      | Normal      | Abnormal    | Abnormal    | Abnormal    | Abnormal    |
| Infected         |                                                         | 23      | Normal      | Abnormal    | Abnormal    | Abnormal    | Abnormal    | Abnormal    |
| Infected         |                                                         | 24      | Normal      | Abnormal    | Abnormal    | Abnormal    | Abnormal    | Abnormal    |
| Infected         |                                                         | 25      | Abnormal    | Abnormal    | Abnormal    | Abnormal    | Abnormal    | Abnormal    |
| Infected         | Benznidazole<br>100 mg/ kg                              | 11      | Abnormal    | Abnormal    | Abnormal    | Abnormal    | Abnormal    | Abnormal    |
| Infected         |                                                         | 12      | Normal      | Abnormal    | Abnormal    | Abnormal    | Abnormal    | Abnormal?   |
| Infected         |                                                         | 13      | Normal      | Normal      | Abnormal    | Abnormal    | Abnormal    | Abnormal    |
| Infected         |                                                         | 14      | Abnormal    | Abnormal    | Abnormal    | Abnormal    | Abnormal    | Abnormal    |
| Infected         |                                                         | 1       | Normal      | Normal      | Abnormal    | No data     | Abnormal    | Abnormal    |
| Infected         | Pyronaridine<br>300 mg/kg                               | 26      | Normal      | Abnormal    | Abnormal    | Abnormal    | Abnormal    | Abnormal    |
| Infected         |                                                         | 27      | Abnormal    | Abnormal    | Abnormal    | Abnormal    | Abnormal    | Abnormal    |
| Infected         |                                                         | 28      | Abnormal    | Abnormal    | Abnormal    | Abnormal    | Abnormal    | N/A         |
| Infected         |                                                         | 29      | Normal      | Normal      | Abnormal    | Abnormal    | Abnormal    | Abnormal    |
| Infected         |                                                         | 30      | Abnormal    | Abnormal    | Abnormal    | Abnormal    | N/A         | N/A         |
| Infected         | Benznidazole<br>10 mg/kg +<br>Pyronaridine<br>300 mg/kg | 31      | Abnormal    | Abnormal    | Abnormal    | Abnormal    | Abnormal    | Abnormal    |
| Infected         |                                                         | 32      | Normal      | Abnormal    | Abnormal    | Abnormal    | N/A         | N/A         |
| Infected         |                                                         | 33      | Normal      | Abnormal    | Abnormal    | Abnormal    | N/A         | N/A         |

|            |           |    |          |          |          |          |          |          |
|------------|-----------|----|----------|----------|----------|----------|----------|----------|
| Infected   |           | 34 | Normal   | Normal   | Abnormal | Abnormal | Abnormal | N/A      |
| Infected   |           | 3  | Abnormal | Abnormal | Abnormal | Abnormal | Abnormal | Abnormal |
| Infected   | Untreated | 4  | Normal   | Normal   | Normal?  | Normal?  | Abnormal | Abnormal |
| Infected   |           | 5  | Normal   | Abnormal | Abnormal | Abnormal | Abnormal | Abnormal |
| Infected   |           | 16 | Normal   | Abnormal | Abnormal | Abnormal | Abnormal | Abnormal |
| Infected   |           | 17 | Abnormal | Abnormal | Abnormal | Abnormal | Abnormal | Abnormal |
| Infected   |           | 18 | Normal   | Abnormal | Abnormal | Abnormal | N/A      | N/A      |
| Infected   |           | 19 | Normal   | ND       | Abnormal | Normal?  | Abnormal | Abnormal |
| Infected   |           | 20 | Abnormal | Normal   | Abnormal | Abnormal | Abnormal | Abnormal |
| Infected   |           |    |          |          |          |          |          |          |
| Uninfected | Vehicle   | 36 | Normal   | Normal   | Normal   | Normal   | Normal   | Normal   |
| Uninfected |           | 37 | Normal   | Normal   | Normal   | Normal   | Normal   | Normal   |
| Uninfected |           | 38 | Normal   | Normal   | Normal   | Normal   | Normal   | Normal   |
| Uninfected |           | 39 | Normal   | Normal   | Normal   | Normal   | Normal   | Normal   |
| Uninfected |           | 40 | Normal   | Normal   | Normal   | Normal   | Abnormal | Abnormal |
